# Supplementary material
Source: ML conference proceedings conference paper supplement (https://openreview.net/forum?id=eYcK7lzlOi)
Supplement: supplementary_material [file attachment]

| Evaluation Metric | Gain                 |                      | BW                   |                      | PM                   |                      | FoM                  |                      |
|-------------------|----------------------|----------------------|----------------------|----------------------|----------------------|----------------------|----------------------|----------------------|
|                   | RMSE ↓               | Pearson's $r$ ↑      |
| <b>CktGNN</b>     | 0.682 ± 0.004        | 0.723 ± 0.003        | <b>0.596 ± 0.009</b> | <b>0.806 ± 0.008</b> | 0.993 ± 0.002        | 0.288 ± 0.009        | <b>0.597 ± 0.009</b> | <b>0.806 ± 0.007</b> |
| DAGNN             | <b>0.409 ± 0.002</b> | <b>0.911 ± 0.003</b> | 0.639 ± 0.002        | 0.778 ± 0.003        | <b>0.947 ± 0.004</b> | <b>0.412 ± 0.004</b> | 0.639 ± 0.002        | 0.778 ± 0.003        |
| D-VAE             | 0.467 ± 0.004        | 0.881 ± 0.003        | 0.756 ± 0.003        | 0.667 ± 0.002        | 0.999 ± 0.004        | 0.265 ± 0.003        | 0.755 ± 0.004        | 0.668 ± 0.003        |

Table 1: Predictive performance on Ckt-Bench101. Shown is the mean  $\pm$  s.d. of 10 runs with different random seeds. **Best results** are highlighted. FoM characterizes the quality of the circuit, and it is the metric to optimize in most circuit optimization. Gain, bw, pm are other circuit properties.

| Methods       | Valid DAGs (%) ↑ | Valid circuits (%) ↑ | Novel circuits (%) ↑ | Reconstruction (Acc) ↑ |
|---------------|------------------|----------------------|----------------------|------------------------|
| <b>CktGNN</b> | 93.10            | <b>91.92</b>         | 96.34                | <b>0.453</b>           |
| DAGNN         | <b>98.81</b>     | 37.96                | <b>98.67</b>         | 0.180                  |
| D-VAE         | 89.75            | 39.53                | 96.78                | 0.149                  |

Table 2: Effectiveness in real-world electronic circuit design. Overall, the valid circuits proportion plays the most critical role in real-world circuit optimization through Bayesian optimization.

| Methods       | Bohamiann search                     |                                     | DNGO search                          |                                     |
|---------------|--------------------------------------|-------------------------------------|--------------------------------------|-------------------------------------|
|               | Best FoM (detected) $\uparrow$       | Regret $\downarrow$                 | Best FoM (detected) $\uparrow$       | Regret $\downarrow$                 |
| <b>CktGNN</b> | <b>175.85 <math>\pm</math> 11.26</b> | <b>21.37 <math>\pm</math> 11.26</b> | <b>163.29 <math>\pm</math> 16.57</b> | <b>33.94 <math>\pm</math> 16.57</b> |
| DAGNN         | 168.61 $\pm$ 11.25                   | 28.62 $\pm$ 11.25                   | 162.58 $\pm$ 15.33                   | 34.65 $\pm$ 15.33                   |
| D-VAE         | 154.21 $\pm$ 14.83                   | 43.02 $\pm$ 14.83                   | 152.72 $\pm$ 20.62                   | 44.51 $\pm$ 20.62                   |

Table 3: Bayesian optimization results on Ckt-Bench301. Shown is the mean  $\pm$  s.d. of 20 runs with different random seeds. **Best results** are highlighted. Best FoM (detected) is the FoM of the circuit detected by the searching algorithm, while regret is the difference of it and the oracle optimal FoM.
