# Supplementary material
Source: ML conference proceedings conference paper supplement (https://openreview.net/forum?id=eYcK7lzlOi)
Supplement: supplementary_material [file attachment]

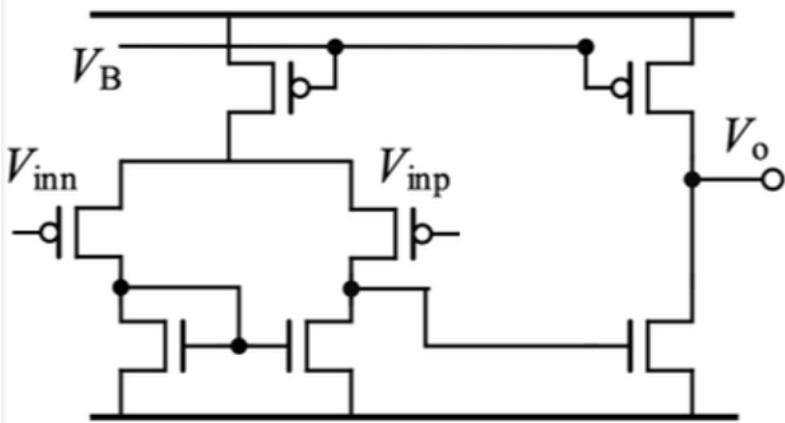

**Analog circuit**

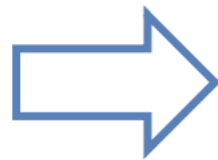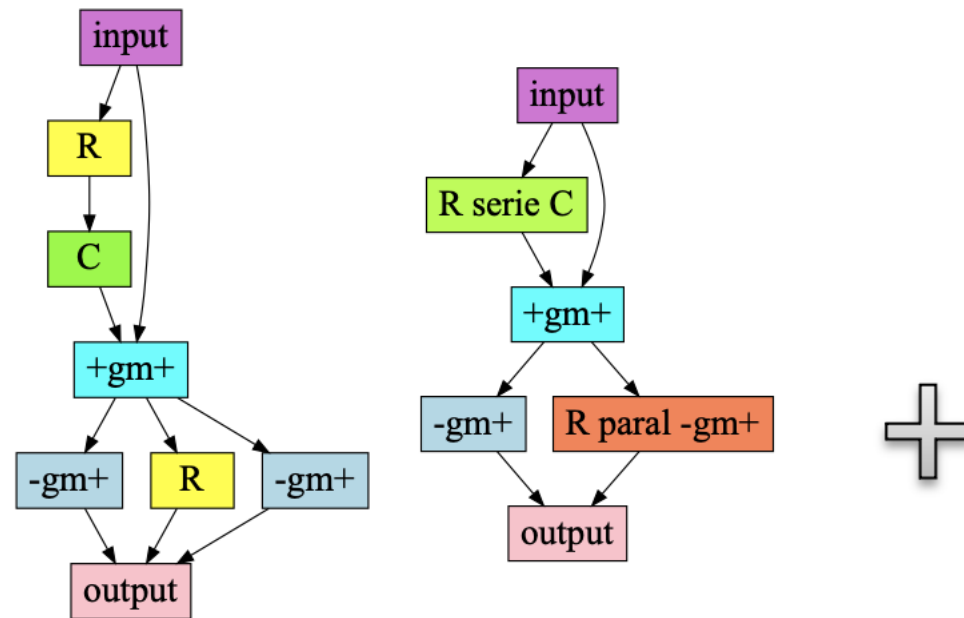

## Graphs

- a DAG represents the analog circuit
- an equivalent 'graph of subgraphs'

| Gain | BW    | PM   | FoM    |
|------|-------|------|--------|
| 2.10 | 26.41 | 3.99 | 271.63 |

## Graph properties

- simulated on circuit simulators
